# Supplementary material for: Molecular simulation studies on the design of multicomponent sorbic acid crystals for tuning solubility
Source: Royal Society of Chemistry journal article supplement (doi:10.1039/d3ce00392b), 2023-01-01
Supplement: d3ce00392b1.pdf [file d3ce00392b1.pdf]

## **Molecular simulation studies on the design of multicomponents**

### **Sorbic acid crystals for tuning solubility**

Chang Li<sup>a#</sup>, Di Wu<sup>a#</sup>, Zhenguo Gao<sup>a\*</sup>, Wei Chen<sup>a,b\*</sup>

<sup>a</sup> National Engineering Research Center of Industrial Crystallization Technology, School of Chemical Engineering and Technology, Tianjin University, Tianjin 300072, P. R. China;

<sup>b</sup> Collaborative Innovation Center of Chemical Science and Engineering, Tianjin 300072, P. R. China;

#### AUTHOR INFORMATION

\* Corresponding author.

E-mail address: chenwei@tju.edu.cn (Wei Chen)

Telephone number: (86) 13820153932

# Chang Li and Di Wu contributed equally to this work

## Contents

**Figure S1.** FTIR spectra of SA, NIA and SA-NIA.

**Figure S2.** FTIR spectra of SA, PIP and SA-PIP.

**Figure S3.** FTIR spectra of SA, 2,6-DAP and SA-2,6-DAP-H<sub>2</sub>O.

**Figure S4.** PXRD patterns of SA and its multicomponent crystals before and after equilibrium solubility experiments (SE).

**Figure S5.** HPLC standard curve of SA.

**Figure S6.** HPLC standard curve of NIA.

**Figure S7.** Percentage contributions of molecular contact interactions to the Hirshfield surface in three multicomponent crystals.

**Figure S8.** HOMO–LUMO plot of NIA, PIP and 2,6-DAP with orbital involved in electronic transitions.

**Table S1.** SA, Salt/Cocrystal FTIR Stretching Frequency.

**Table S2.** Parameters (Å, Degree) of the Hydrogen Bonds for Multicomponent Crystals of SA.

**Table S3.** Experimental solid–liquid equilibrium data (mass fraction) for SA-NIA at 20°C and 30°C.

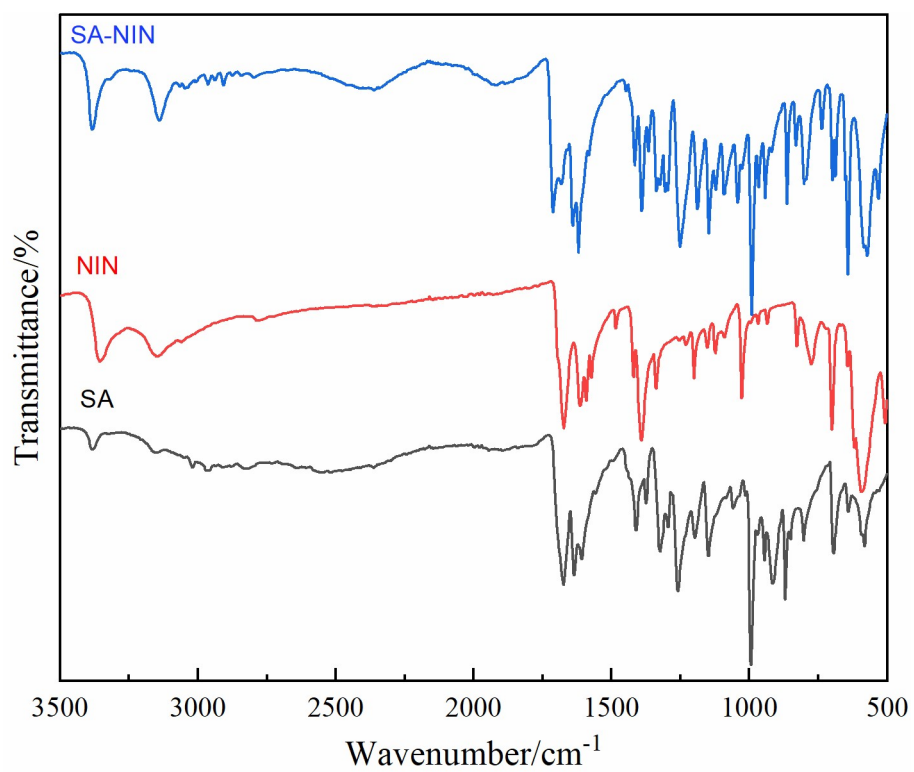

Figure S1. FTIR spectra of SA, NIA and SA-NIA.

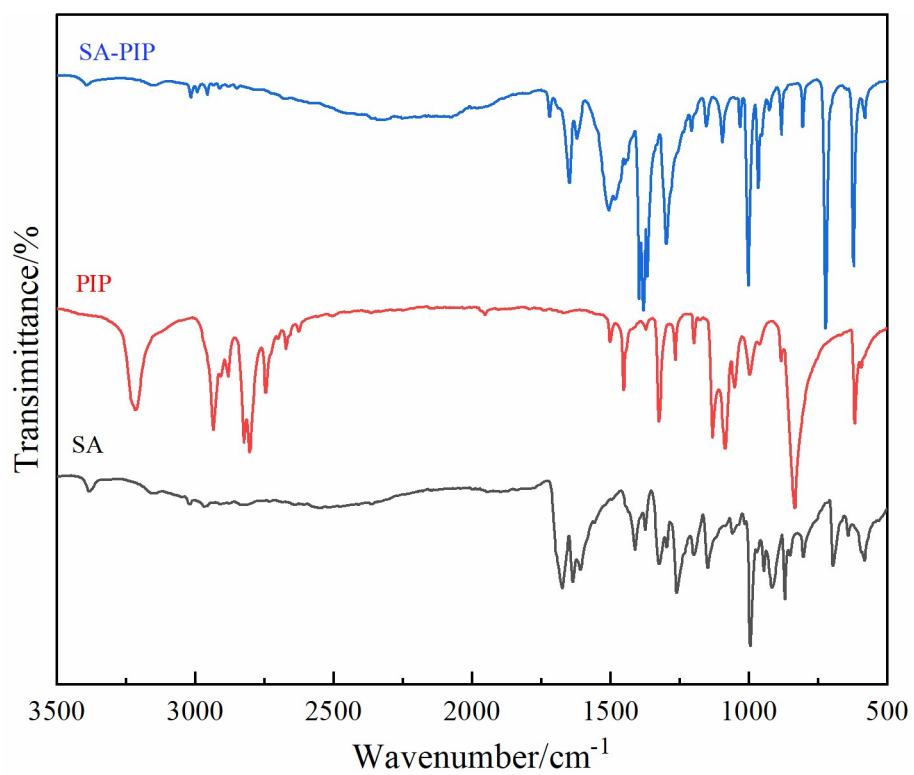

Figure S2. FTIR spectra of SA, PIP and SA-PIP.

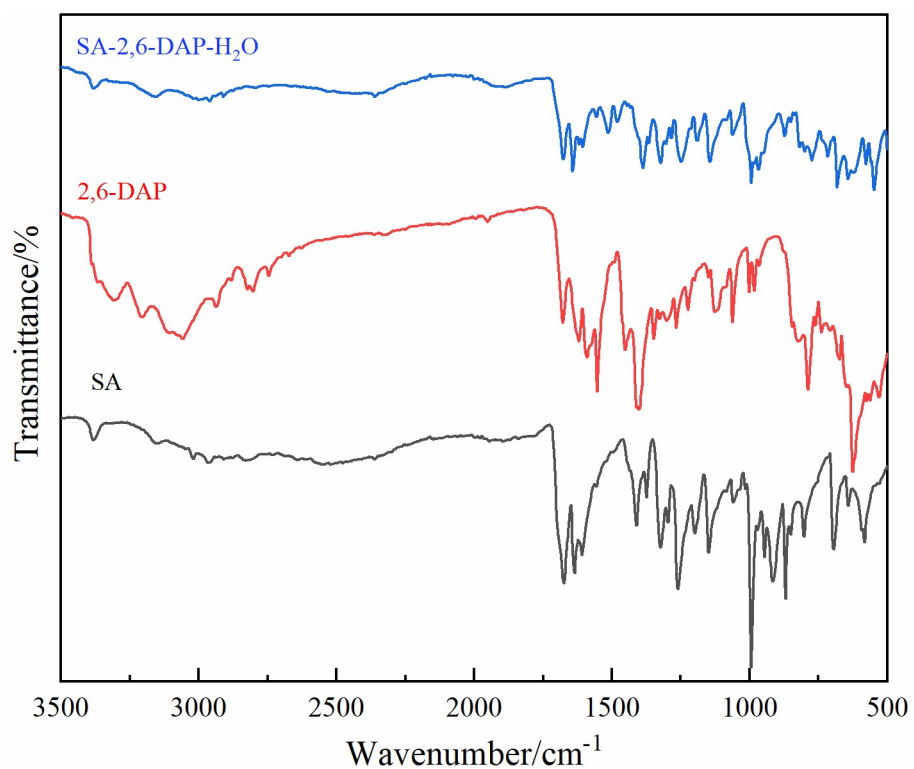

Figure S3. FTIR spectra of SA, 2,6-DAP and SA-2,6-DAP-H<sub>2</sub>O.

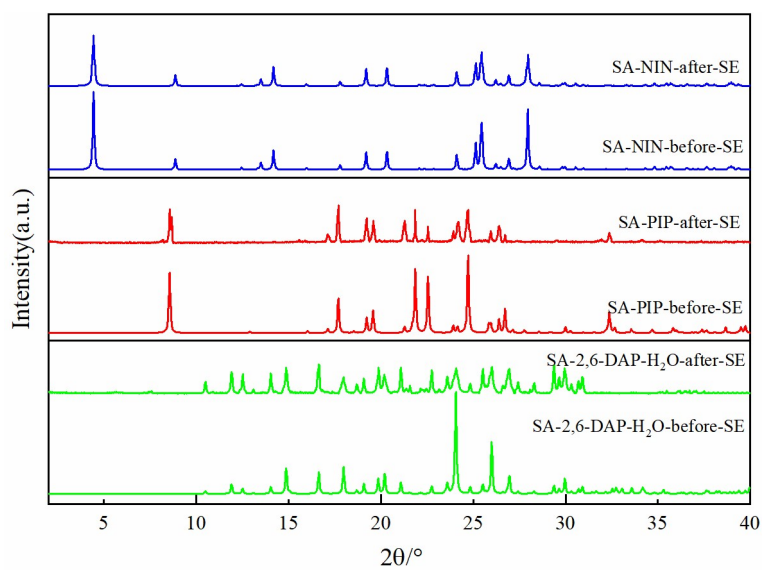

Figure S4. PXRD patterns of SA and its multicomponent crystals before and after equilibrium solubility experiments (SE).

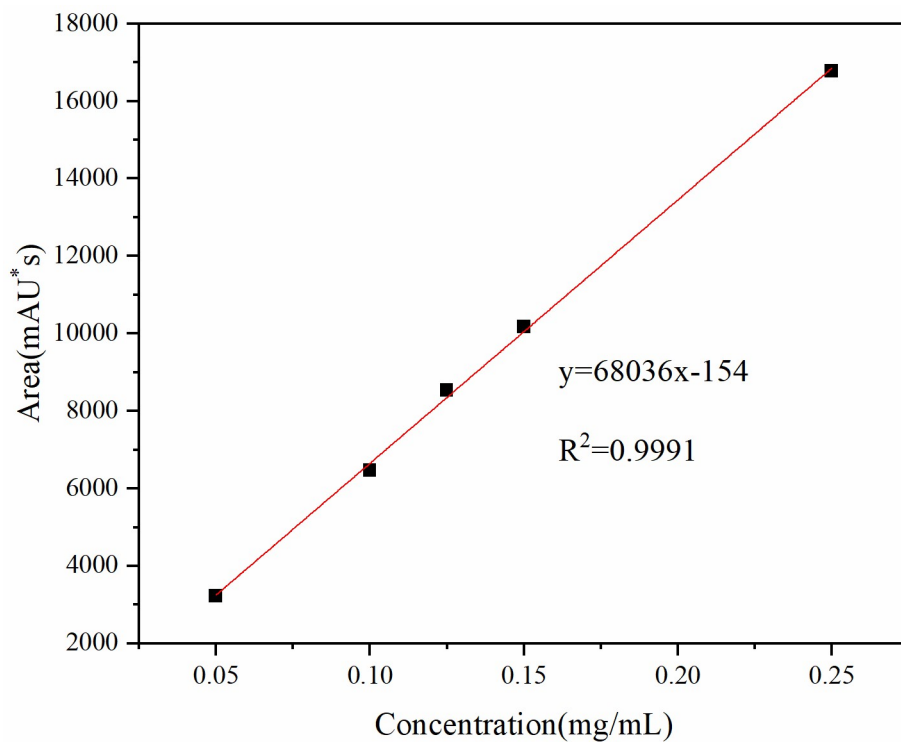

Figure S5. HPLC standard curve of SA.

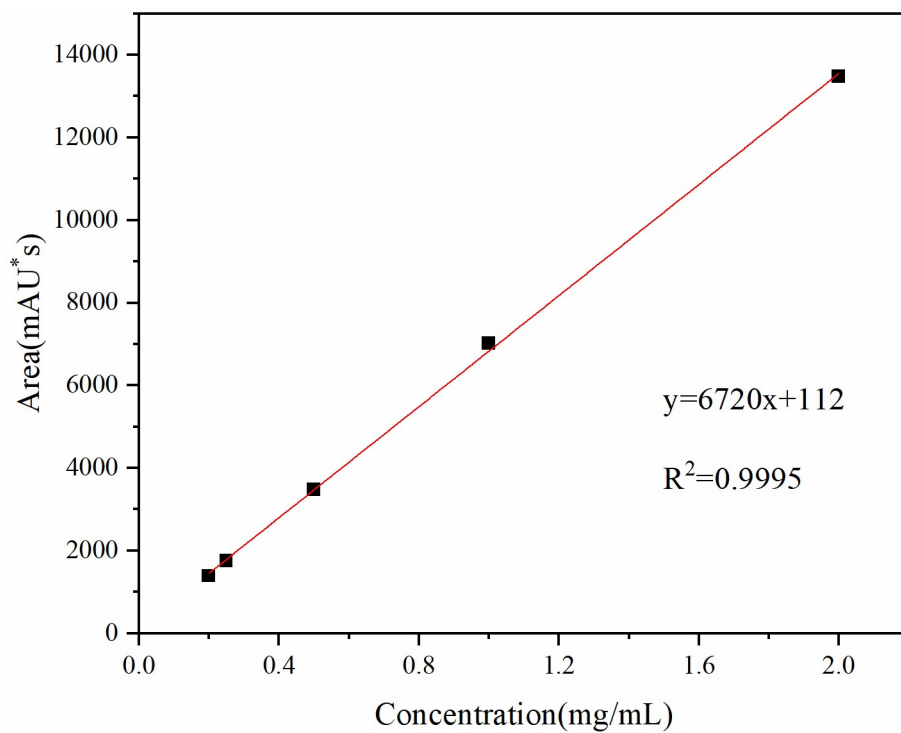

Figure S6. HPLC standard curve of NIA.

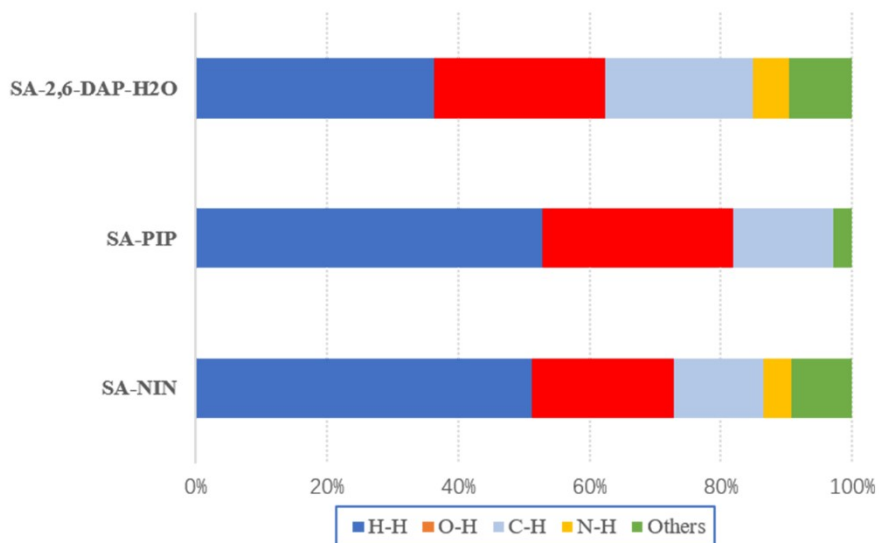

Figure S7. Percentage contributions of molecular contact interactions to the Hirshfield surface in three multicomponent crystals.

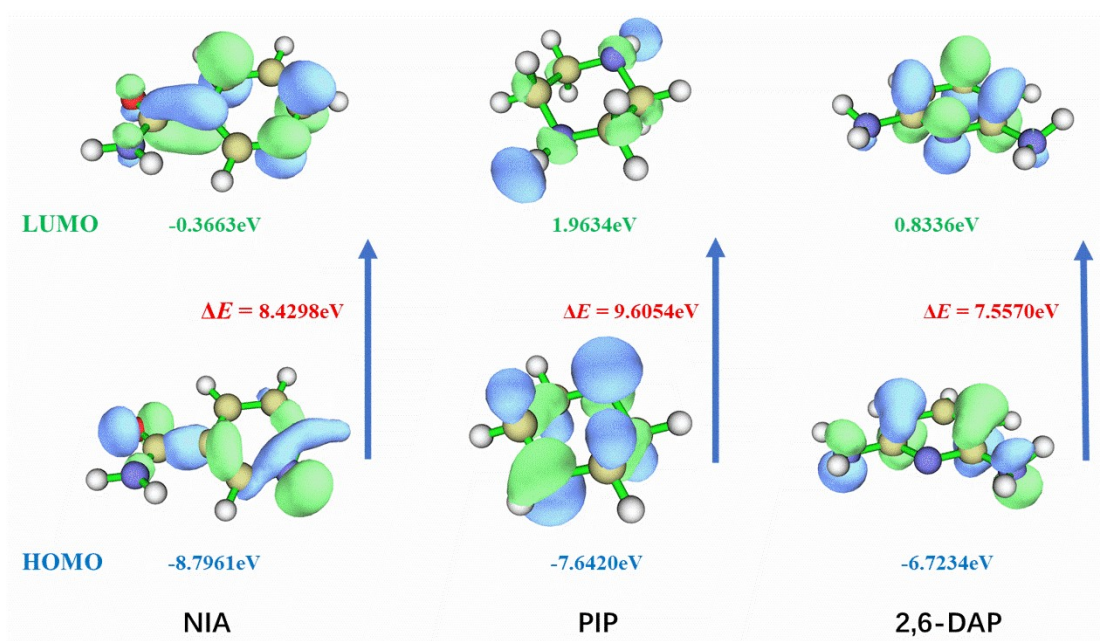

Figure S8. HOMO-LUMO plot of NIA, PIP and 2,6-DAP with orbital involved in electronic transitions.

Table S1. SA, Salt/Cocrystal FTIR Stretching Frequency

| compound | -C=O(cm <sup>-1</sup> ) | -OH (cm <sup>-1</sup> ) | -NH (cm <sup>-1</sup> ) |
|----------|-------------------------|-------------------------|-------------------------|
| SA       | 1674                    | 3383                    | /                       |
| NIA      | 1674                    | /                       | 3354                    |
| PIP      | /                       | /                       | 3216                    |
| 2,6-DAP  | /                       | /                       | 3206                    |
| SA- NIA  | 1641                    | 3383                    | 3140                    |
| SA- PIP  | 1647                    | 3391                    | 3016                    |

|                             |      |      |      |
|-----------------------------|------|------|------|
| SA-2,6-DAP-H <sub>2</sub> O | 1643 | 3381 | 3156 |
|-----------------------------|------|------|------|

Table S2. Parameters (Å, Degree) of the Hydrogen Bonds for Multicomponent Crystals of SA.

| D-H...A                                            | D-H  | H...A | D...A | D-H...A | symmetry                 |
|----------------------------------------------------|------|-------|-------|---------|--------------------------|
| <b>SA-NIA</b>                                      |      |       |       |         |                          |
| O <sub>2</sub> -H <sub>2</sub> ...N <sub>1</sub>   | 1.01 | 1.62  | 2.63  | 175     |                          |
| N <sub>2</sub> -H <sub>2C</sub> ...O <sub>1</sub>  | 0.90 | 2.15  | 3.04  | 172     | -1+x, y, z               |
| N <sub>2</sub> -H <sub>2B</sub> ...O <sub>3</sub>  | 0.91 | 1.97  | 2.88  | 176     | -1-x,1-y,1-z             |
| C <sub>11</sub> -H <sub>11</sub> ...O <sub>1</sub> | 0.95 | 2.57  | 3.40  | 146     | x, -1+y, z               |
| <b>SA-PIP</b>                                      |      |       |       |         |                          |
| N <sub>1</sub> -H <sub>1A</sub> ...O <sub>1</sub>  | 0.97 | 1.71  | 2.68  | 177     |                          |
| N <sub>1</sub> -H <sub>1A</sub> ...O <sub>2</sub>  | 0.97 | 2.52  | 3.16  | 123     |                          |
| N <sub>1</sub> -H <sub>1B</sub> ...O <sub>2</sub>  | 0.99 | 1.69  | 2.67  | 173     | -1+x, y, z               |
| C <sub>2</sub> -H <sub>2</sub> ...O <sub>1</sub>   | 0.93 | 2.56  | 3.49  | 174     | 1+x, y, z                |
| C <sub>3</sub> -H <sub>3</sub> ...O <sub>1</sub>   | 0.93 | 2.50  | 2.82  | 100     |                          |
| C <sub>7</sub> -H <sub>7A</sub> ...O <sub>1</sub>  | 0.97 | 2.37  | 3.33  | 169     | -x,1-y,1-z               |
| <b>SA-2,6-DAP-H<sub>2</sub>O</b>                   |      |       |       |         |                          |
| N <sub>1</sub> -H <sub>1</sub> ...O <sub>2</sub>   | 0.92 | 1.82  | 2.74  | 178     |                          |
| N <sub>2</sub> -H <sub>2A</sub> ...O <sub>3</sub>  | 0.90 | 1.99  | 2.89  | 172     | -1/2+x,1/2-y,1/2+z       |
| N <sub>2</sub> -H <sub>2B</sub> ...O <sub>1</sub>  | 0.91 | 1.99  | 2.90  | 178     |                          |
| N <sub>3</sub> -H <sub>3A</sub> ...O <sub>3</sub>  | 0.90 | 2.07  | 2.96  | 171     |                          |
| N <sub>3</sub> -H <sub>3B</sub> ...O <sub>1</sub>  | 0.89 | 2.19  | 3.04  | 159     | -1/2+x,1/2-y, -<br>1/2+z |
| O <sub>3</sub> -H <sub>3C</sub> ...O <sub>2</sub>  | 0.89 | 1.84  | 2.68  | 158     |                          |
| O <sub>3</sub> -H <sub>3D</sub> ...O <sub>1</sub>  | 0.86 | 1.89  | 2.73  | 169     | 3/2-x, -1/2+y,3/2-z      |

Table S3. Experimental solid–liquid equilibrium data (mass fraction) for SA-NIA at 20°C and 30°C and pressure  $p = 101.3 \text{ kPa}$ .<sup>a</sup>

| $T/^\circ\text{C}$ | Mass fraction |         |         | Equilibrium solid phase <sup>b</sup> |
|--------------------|---------------|---------|---------|--------------------------------------|
|                    | SA            | NIA     | EtOH    |                                      |
| 20                 | 0             | 0.10944 | 0.89056 | NIA                                  |
|                    | 0.02242       | 0.11059 | 0.86699 | NIA                                  |
|                    | 0.05273       | 0.10938 | 0.83789 | NIA                                  |
|                    | 0.06245       | 0.10684 | 0.83071 | NIA+1:1SA-NIA                        |
|                    | 0.06972       | 0.09998 | 0.8303  | 1:1SA-NIA                            |
|                    | 0.09215       | 0.06287 | 0.84499 | 1:1SA-NIA                            |
|                    | 0.10266       | 0.05759 | 0.83976 | 1:1SA-NIA                            |
|                    | 0.11828       | 0.04771 | 0.83401 | SA+1:1SA-NIA                         |
|                    | 0.12356       | 0.04049 | 0.83595 | SA                                   |
|                    | 0.12684       | 0       | 0.87316 | SA                                   |
| 30                 | 0             | 0.11823 | 0.88177 | NIA                                  |
|                    | 0.02158       | 0.12365 | 0.85477 | NIA                                  |
|                    | 0.0631        | 0.12694 | 0.80996 | NIA                                  |
|                    | 0.07318       | 0.12189 | 0.80493 | NIA+1:1SA-NIA                        |
|                    | 0.08000       | 0.11214 | 0.80786 | 1:1SA-NIA                            |
|                    | 0.11137       | 0.07722 | 0.81141 | 1:1SA-NIA                            |
|                    | 0.13871       | 0.06069 | 0.8006  | SA+1:1SA-NIA                         |
|                    | 0.14337       | 0.04538 | 0.81125 | SA                                   |
|                    | 0.12986       | 0       | 0.87014 | SA                                   |

<sup>a</sup> Standard uncertainty  $u$  is  $u(T) = 0.01 \text{ K}$ ,  $u(p) = 10 \text{ kPa}$ ; the relative standard uncertainty of mass fraction  $u_{r(x)} = 0.05$ .

<sup>b</sup> Mole ratio of SA-to-NIA in cocrystal is 1:1.
